# Supplementary material for: Deep genetic divergences among Indo-Pacific populations of the coral reef sponge Leucetta chagosensis (Leucettidae): Founder effects, vicariance, or both?
Source: PubMed Central journal article supplement (PMC2267160; doi:10.1186/1471-2148-8-24), 2008-01-26
Supplement: 1471-2148-8-24-S2.pdf [file 1471-2148-8-24-S2.pdf]

|                      |     |                                                                   |
|----------------------|-----|-------------------------------------------------------------------|
| DQ087473Microciona   | 1   | PKTLGRITINVIGEPIDERGPIGEEMQAAITHADAPEFVDMNVKQOEILVTGIKVVDLLAPYA   |
| DQ087459Sycon        | 1   | VELTLGRIMNVIGEPIDERGPINAKATAEPTHAEAPEFVDMSEVQOEILETGIVKVVDLLAPYA  |
| DQ087466Leucosolenia | 1   | PELTLGRIMNVIGEPIDERGPIIDAKASAEPTHAEAPEFVDMSEVQOEILETGIVKVVDLLAPYA |
| 316175_Klon3_Exon    | 1   | -----                                                             |
|                      |     |                                                                   |
| DQ087473Microciona   | 61  | KGGKIGLFGGAGVGKTVVIMELINNVAKAHGGCSVFAGVGERTREGNDLYHEMIQGGVTS      |
| DQ087459Sycon        | 61  | KGGKIGLFGGAGVGKTVVIMELINNVAKAHGGYSVFAGVGERTREGNDLYHEMIVGGVIV      |
| DQ087466Leucosolenia | 61  | KGGKIGLFGGAGVGKTVVIMELINNVAKAHGGYSVFAGVGERTREGNDLYHEMIVGGVIV      |
| 316175_Klon3_Exon    | 1   | -----REGNDFYHEMITGGVIV                                            |
|                      |     |                                                                   |
| DQ087473Microciona   | 121 | LKDDSSK/VALVYQMNPPGARARVALTGLTVAEYFRDKEGQDVLLFDINIFRFTQAGS        |
| DQ087459Sycon        | 121 | LDKPGSK/VALVYQMNPPGARARVALTGLTVAEYFRDKEGQDVLLFDINIFRFTQAGS        |
| DQ087466Leucosolenia | 121 | LDKPGSK/VSLVYQMNPPGARARVALTGLTVAEYFRDKEGQDVLLFDINIFRFTQAGS        |
| 316175_Klon3_Exon    | 18  | LDKEGSK/VSLVYQMNPPGARAR-----                                      |
|                      |     | *                                                                 |
|                      |     |                                                                   |
| DQ087473Microciona   | 180 | EVSALLGRIPLLWATSQTLATDMGIMQERITTTQKGSITSVQAVFVPADDLTDPAATTF       |
| DQ087459Sycon        | 180 | EVSALLGRIPSAVGYQPTLATDMGSMQERITTTKEGSITSVQAIYVPADDLTDPAATTF       |
| DQ087466Leucosolenia | 180 | EVSALLGRIPSAVGYQPTLATDMGSMQERITTP-EGSITSVQAIYVPADDLTDPAATTF       |
| 316175_Klon3_Exon    |     | -----                                                             |
|                      |     |                                                                   |
| DQ087473Microciona   | 240 | AHLDATTVLSRAISELGIYPAVDPLDSTSRIMDPNIVGAEHYNNVARGVQKILQDYRSLQD     |
| DQ087459Sycon        | 240 | AHLDATTVLSRGI AELGIYPAVDPLDSTSRILDPNIVGQEHYSIARSVQKILQDYKSLQD     |
| DQ087466Leucosolenia | 239 | AHLDATTVLSRGI AELGIYPAVDPLDSTSRILDPNIVGMEHYTIARSVQKILQDYKSLQD     |
| 316175_Klon3_Exon    |     | -----                                                             |
|                      |     |                                                                   |
| DQ087473Microciona   | 300 | IIAILGMDELSEEDKLTVAARARKIQRFLSQPFQVAEVFTGKEGKLVLENTISGFQKIIN      |
| DQ087459Sycon        | 300 | IIAILGMDELSEEDKLTVAARARKIQRFLSQPFQVAEVFTGKPGKFFVLEQTIKGFTSILN     |
| DQ087466Leucosolenia | 299 | IIAILGMDELSEEDKLTVAARARKIQRFLSQPFQVAEVFTGKPGKFFV-----             |
| 316175_Klon3_Exon    |     | -----                                                             |
|                      |     |                                                                   |
| DQ087473Microciona   | 360 | GELDDIPE                                                          |
| DQ087459Sycon        | 360 | GEHDHIPL                                                          |
| DQ087466Leucosolenia |     | -----                                                             |
| 316175_Klon3_Exon    |     | -----                                                             |

**Additional Figure 1:** Amino acid alignment of three sponge ATP Synthetase beta subunit sequences from Genbank (accession numbers DQ087473, DQ087459, DQ087466) and the sequence of *Leucetta chagosensis* (Specimen No. QMG 316175). Location of intron is indicated by a forward slash and \* above the site. Black alignment background indicates conserved alignment positions, grey background similar chemical properties, white background variable positions with dissimilar amino acids.
