# Supplementary material for: Deep genetic divergences among Indo-Pacific populations of the coral reef sponge Leucetta chagosensis (Leucettidae): Founder effects, vicariance, or both?
Source: PubMed Central journal article supplement (PMC2267160; doi:10.1186/1471-2148-8-24), 2008-01-26
Supplement: 1471-2148-8-24-S3.pdf [file 1471-2148-8-24-S3.pdf]

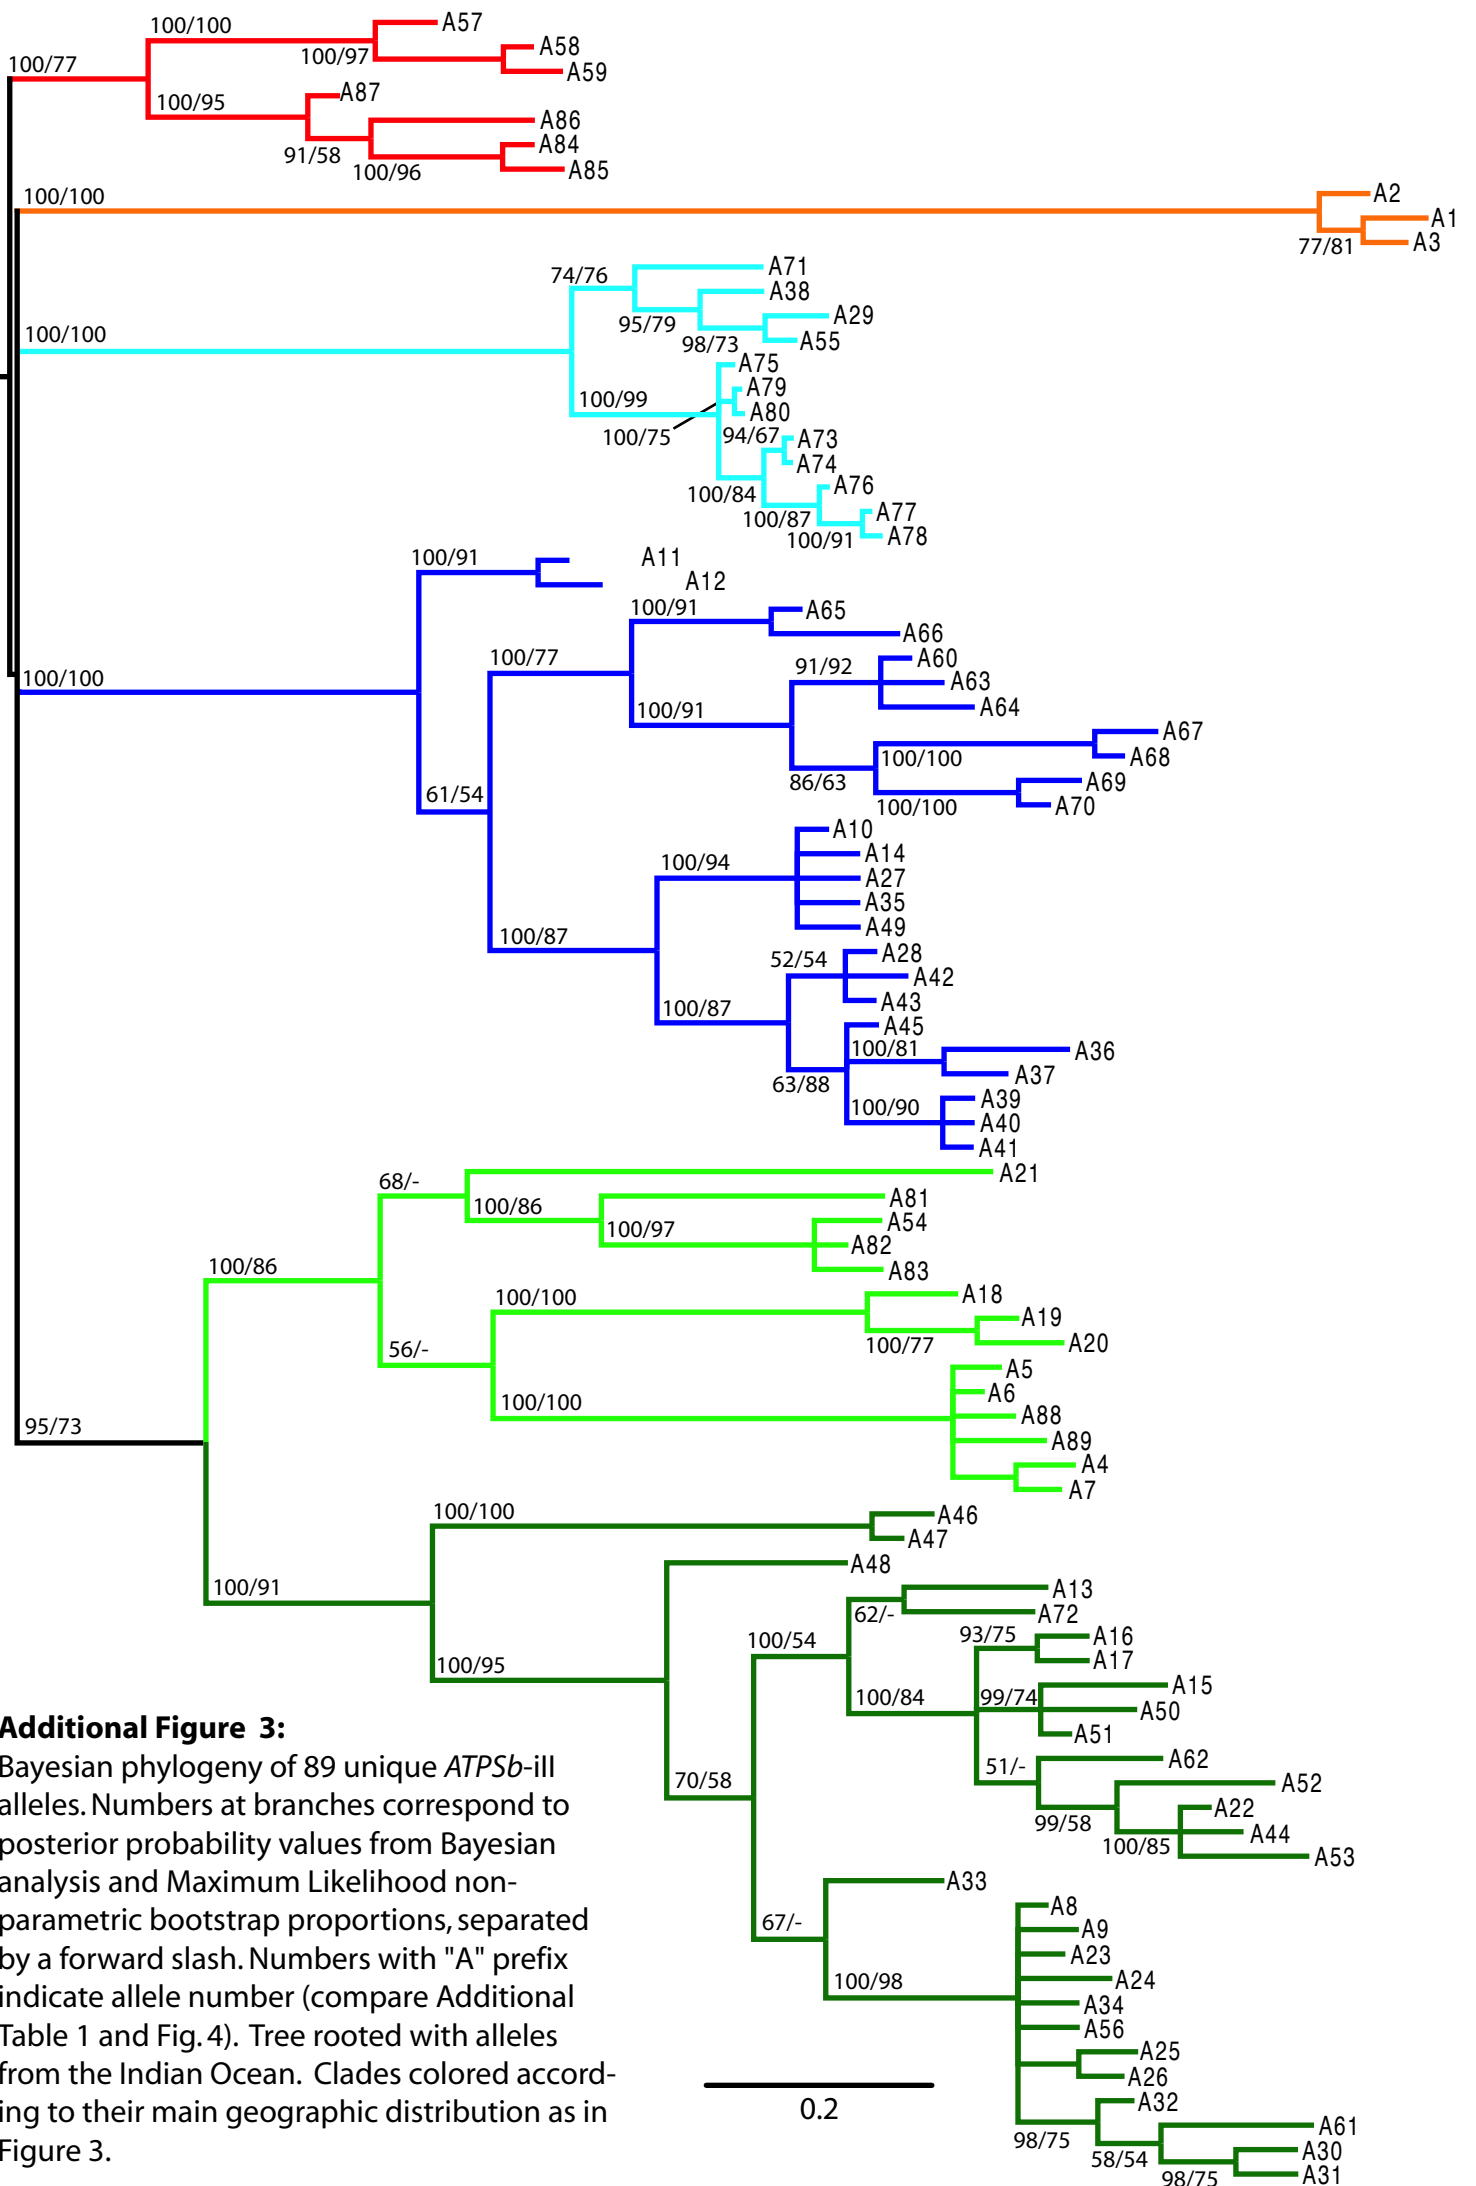

**Additional Figure 3:**

Bayesian phylogeny of 89 unique *ATPSb-III* alleles. Numbers at branches correspond to posterior probability values from Bayesian analysis and Maximum Likelihood non-parametric bootstrap proportions, separated by a forward slash. Numbers with "A" prefix indicate allele number (compare Additional Table 1 and Fig. 4). Tree rooted with alleles from the Indian Ocean. Clades colored according to their main geographic distribution as in Figure 3.
