# Supplementary material for: Deep genetic divergences among Indo-Pacific populations of the coral reef sponge Leucetta chagosensis (Leucettidae): Founder effects, vicariance, or both?
Source: PubMed Central journal article supplement (PMC2267160; doi:10.1186/1471-2148-8-24), 2008-01-26
Supplement: 1471-2148-8-24-S4.pdf [file 1471-2148-8-24-S4.pdf]

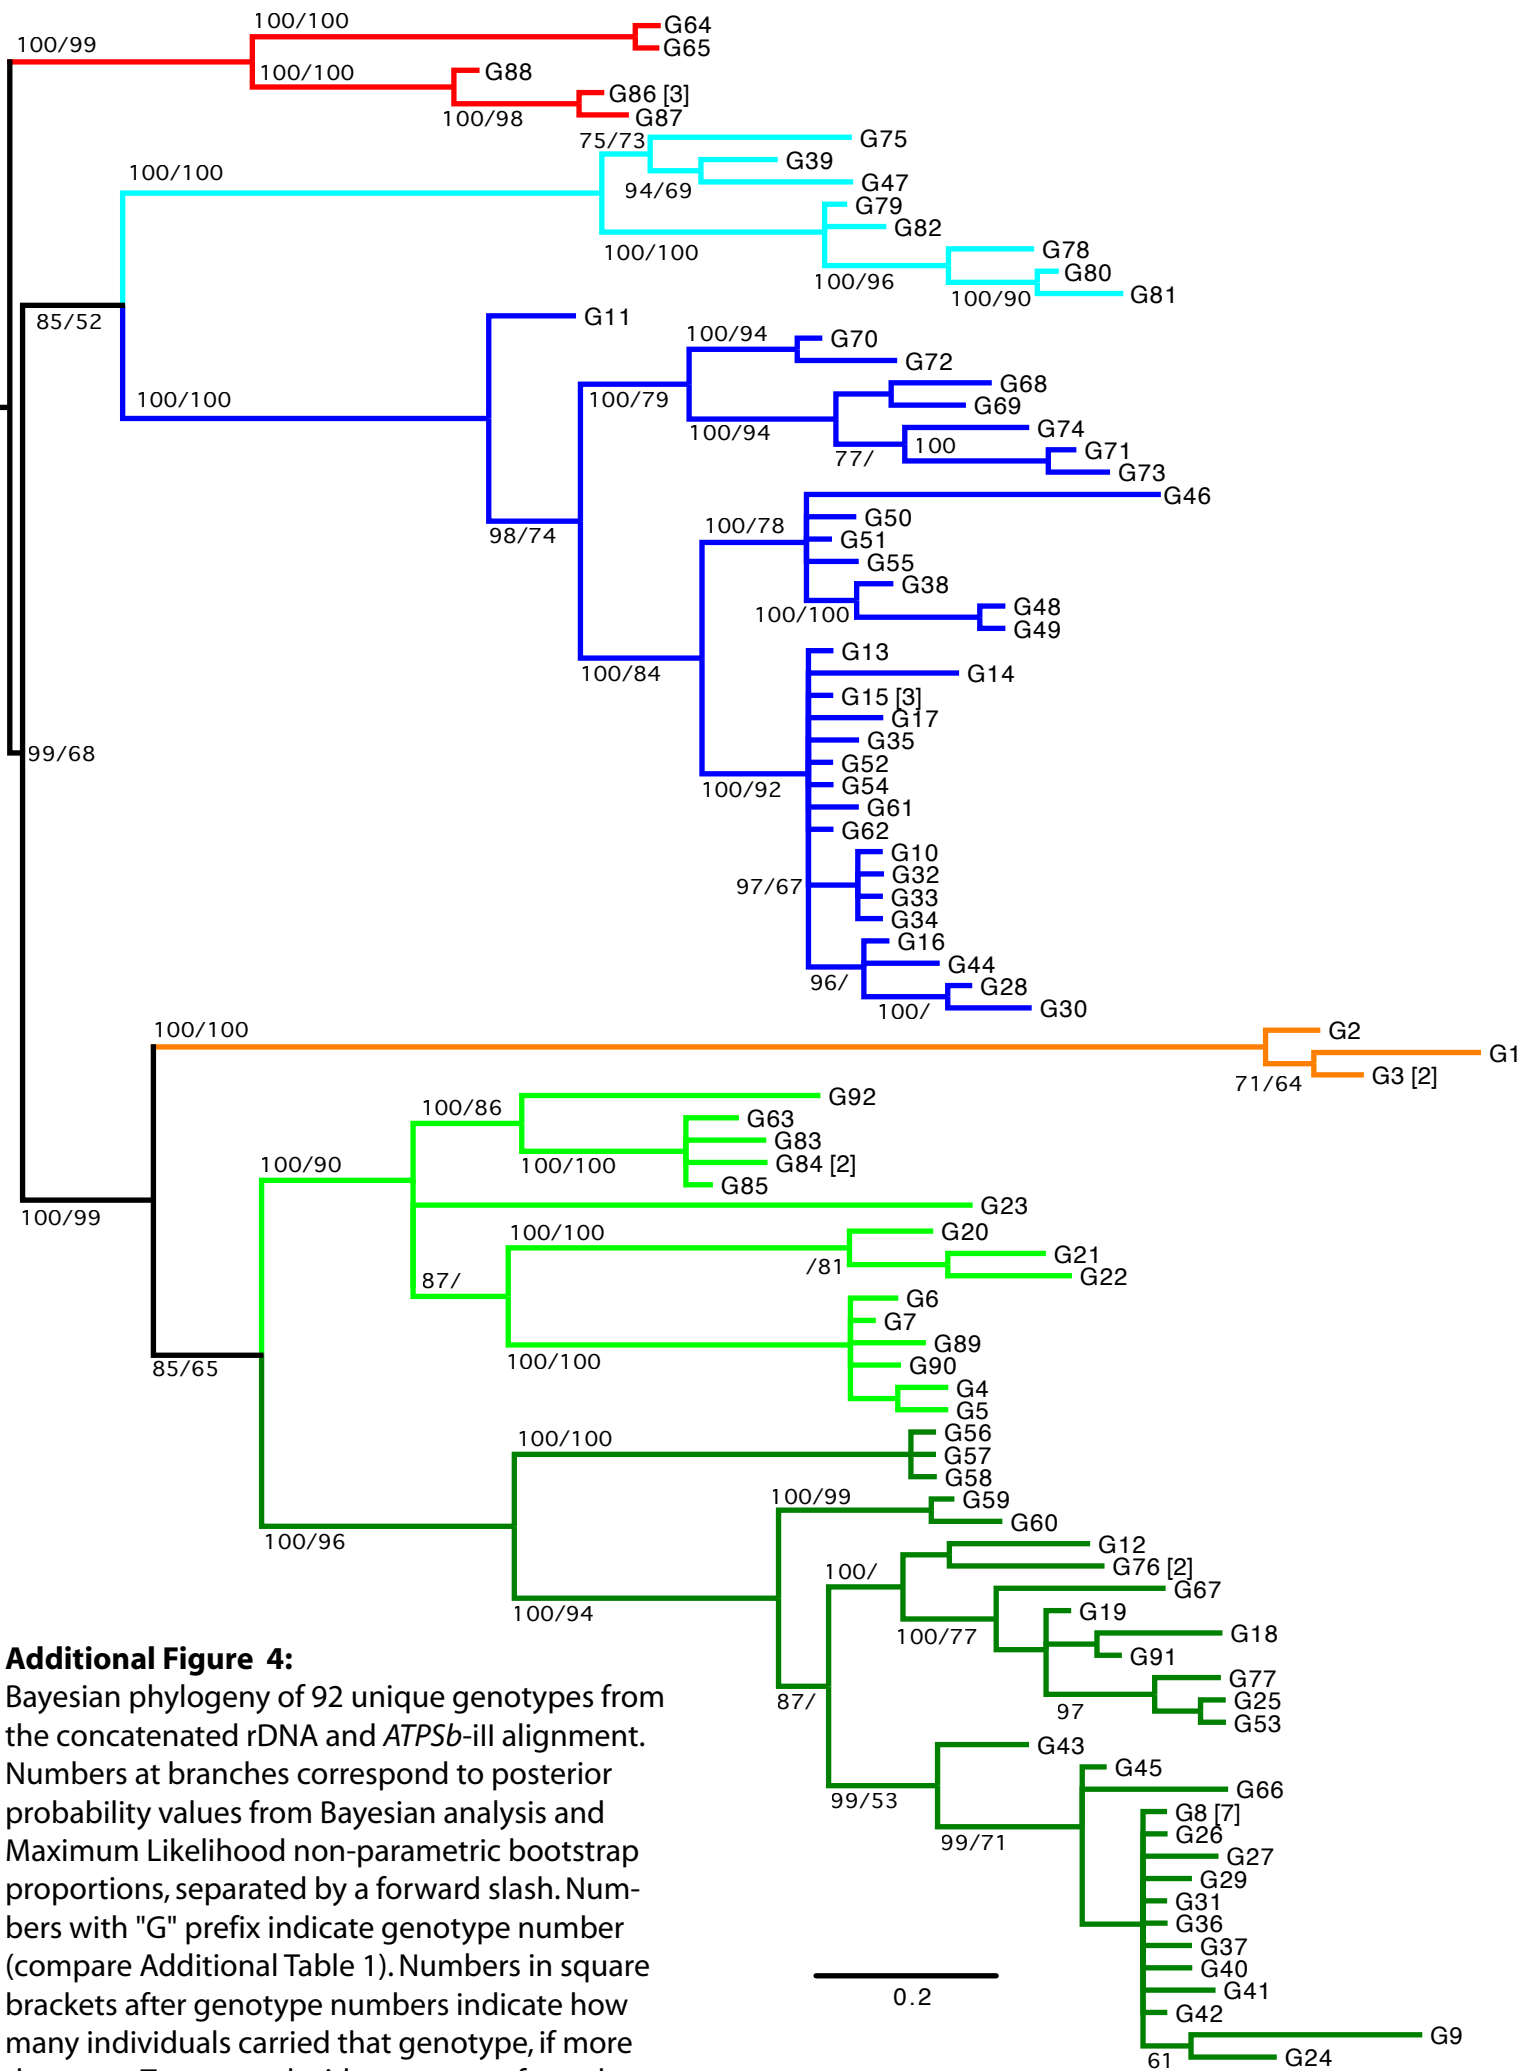

**Additional Figure 4:**

Bayesian phylogeny of 92 unique genotypes from the concatenated rDNA and *ATPSb*-III alignment. Numbers at branches correspond to posterior probability values from Bayesian analysis and Maximum Likelihood non-parametric bootstrap proportions, separated by a forward slash. Numbers with "G" prefix indicate genotype number (compare Additional Table 1). Numbers in square brackets after genotype numbers indicate how many individuals carried that genotype, if more than one. Tree rooted with genotypes from the Indian Ocean (compare Figure 5a & b).
