# Supplementary material for: Deep genetic divergences among Indo-Pacific populations of the coral reef sponge Leucetta chagosensis (Leucettidae): Founder effects, vicariance, or both?
Source: PubMed Central journal article supplement (PMC2267160; doi:10.1186/1471-2148-8-24), 2008-01-26

### Additional Figure 5:

Neighbor-Net analysis of the different partitions (rDNA and *ATPSb*-III) and the concatenated alignment of 92 unique genotypes found among the 105 individuals of *Leucetta chagosensis*.

Sequences with different phylogenetic relationships in the different networks are highlighted in red on white ovals. Color coding of branches according to main geographical distribution, as in Figures 2, 3, 5.

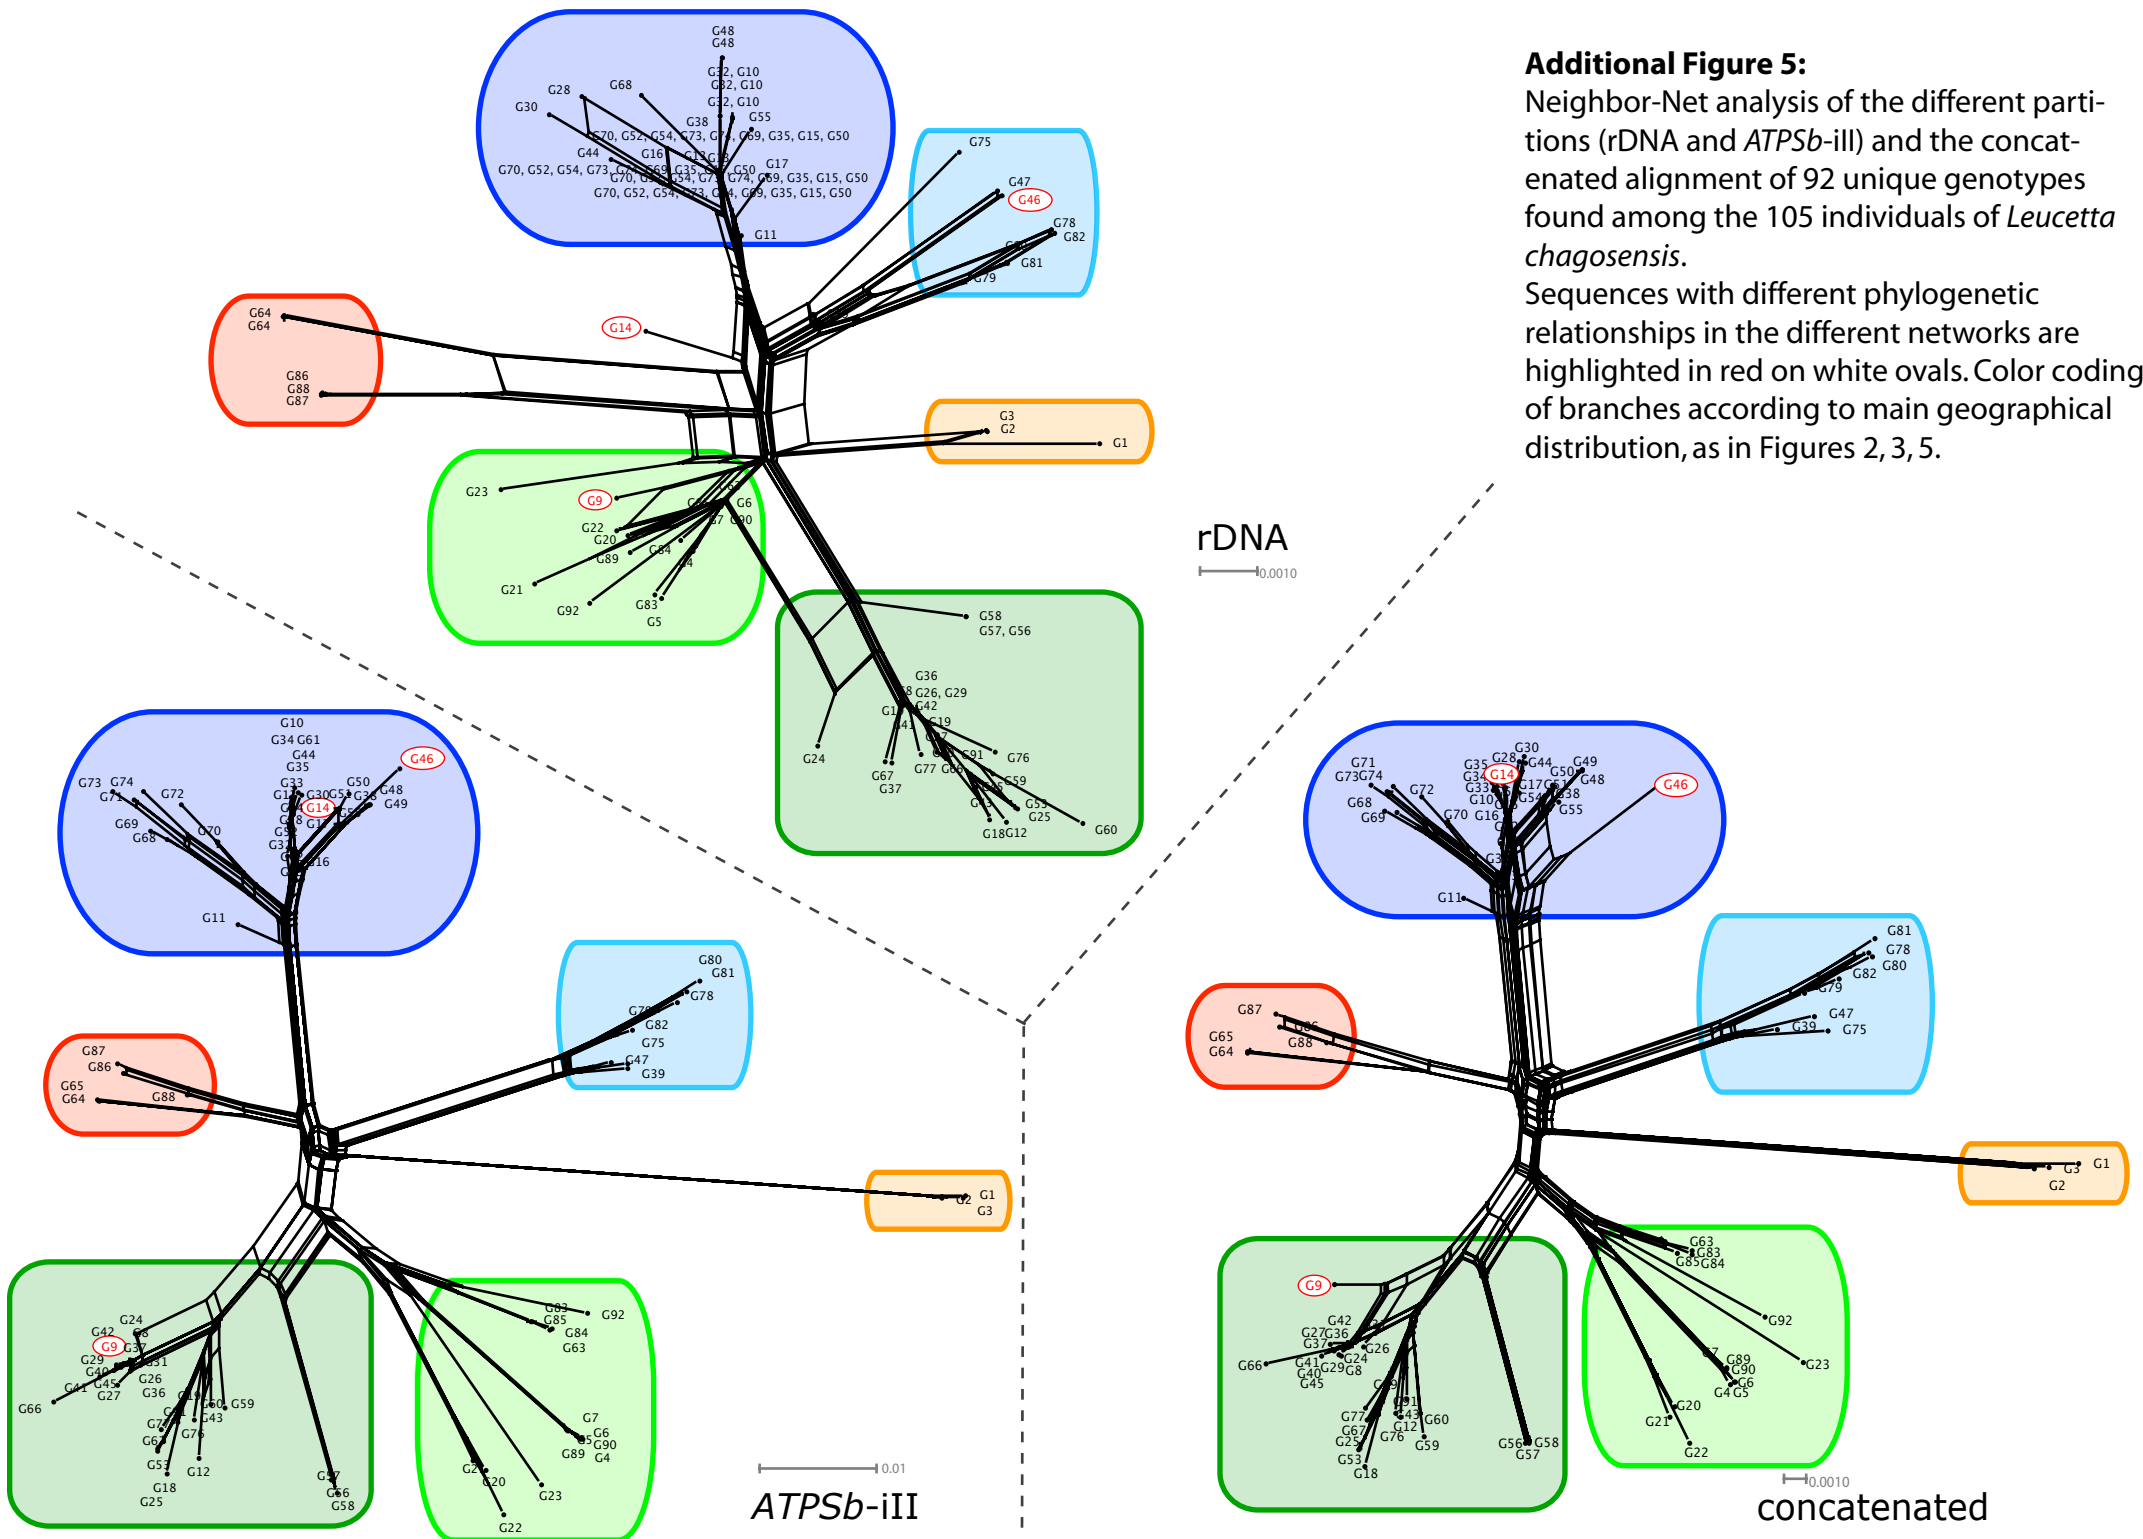

Supplement: 1471-2148-8-24-S5.pdf [file 1471-2148-8-24-S5.pdf]
